# Supplementary material for: Kinetics enhanced hierarchical Ni2P1−xSx/Ni@carbon/graphene yolk–shell microspheres boosting advanced sodium/potassium storage
Source: Royal Society of Chemistry journal article supplement (doi:10.1039/d0ta08466b), 2020-01-01
Supplement: d0ta08466b1.pdf [file d0ta08466b1.pdf]

## Supporting Information

**Kinetics enhanced hierarchical  $\text{Ni}_2\text{P}_{1-x}\text{S}_x/\text{Ni}$ @carbon/graphene yolk-shell microspheres  
boosting advanced sodium/potassium storage**

## Experimental Section

*Uniform Ni-MOFs precursor spheres synthesis.* All the chemicals were directly used after purchase without further purification. The hydrothermal method was followed to synthesize Ni-MOFs precursors.<sup>1</sup> Under vigorous magnetic stirring, a mixture of 0.605 g  $\text{Ni}(\text{NO}_3)_2 \cdot 6\text{H}_2\text{O}$ , 0.21 g trimesic acid, and 2.1 g of PVP-K30 ( $M_w = 40000$ ) was dissolved in 42 mL mixture of DMF, ethanol, and water (1:1:1, v/v/v). Then the mixture was sealed in 70 mL Teflon-lined autoclave and heated to 150 °C for 10 h. Afterward, the green precipitate was washed by DMF and ethanol for several times and dried in a vacuum oven at 60 °C for 12 h.

*Yolk-shell (YS)  $\text{Ni}_2\text{P}_{1-x}\text{S}_x/\text{Ni}@C/G$  spheres synthesis.* The YS  $\text{Ni}_2\text{P}_{1-x}\text{S}_x/\text{Ni}@C/G$  spheres were obtained via a one-step process. Briefly, 50 mg Ni-MOFs precursor spheres, and the mixture of red P and S powder were separately placed in two quartz boats, and the mixture of red P and S powder was placed at the upstream zone in a tube furnace. The varied mass ratio of P and S (2:1, 1:1, and 1:2) was first mixed with 80 mg of powder using mortar and pestle to synthesize samples with different S/P ratios. Then, the furnace was set to increase up to 450 °C for 2 h with a ramp rate of 1 °C  $\text{min}^{-1}$  bypassing Ar atmosphere to obtain YS  $\text{Ni}_2\text{P}_{1-x}\text{S}_x/\text{Ni}@C/G$  microspheres. For comparison, the pure S powder and P powder replace the mixture of red P and S powder under the same above condition, respectively, were denoted as  $\text{Ni}_9\text{S}_8/\text{Ni}@C/G$ , and  $\text{Ni}_2\text{P}/\text{Ni}@C/G$  composites, respectively. Moreover, the Ni-MOF precursor was calcined in air at 420 °C for 3h with 1 °C  $\text{min}^{-1}$ , and the porous NiO was obtained. Then, 50 mg porous NiO was phosphated by 750 mg  $\text{NaH}_2\text{PO}_2 \cdot \text{H}_2\text{O}$  at 350 °C for 2h to synthesize  $\text{Ni}_2\text{P}$ , and sulfided by 100 mg S powder at 450 °C for 2h and then 600 °C 1h to prepare  $\text{Ni}_9\text{S}_8/\text{NiS}$  in Ar atmosphere, respectively.

*Materials Characterization.* X-ray diffraction (Bruker D8 ADVANCE) with Cu  $K\alpha$  radiation was employed to identify the composition and phase structure of the as-prepared Ni-based hybrids. Field emission scanning electron microscopy SEM (FESEM, SU8220, 20 kV) operating at 5 kV was used to characterize the morphology. TEM, HAADF-STEM, and elemental mapping images were recorded on an FEI Tecnai F20 transmission electron microscope. The valence state of the samples was investigated by X-ray photoelectron spectroscopy (XPS, Axis Ultra DLD, Kratos), using a monochromatic Al- $K\alpha$  as radiation exciting source.  $\text{N}_2$  adsorption/desorption isotherm was investigated at 77K with an automated gas sorption analyzer

(Micromeritics ASAP 2460). The carbon and power contents in the hybrids were determined by thermogravimetric analysis (TGA, TGA/DSC 3+, Switzerland) under Ar and air atmosphere with a heating rate of 10 °C min<sup>-1</sup>, respectively.

*Fabrication of half-cell and full-cell.* The electrochemical performances of as-prepared YS Ni-based composites were performed via CR2025 coin-type cells. For fabrication of the working electrodes, the slurry of working electrodes consisted of 70 wt % active materials of the YS Ni-based composites, 20 wt % acetylene black, and 10 wt % polyvinylidene fluoride in methyl-2-pyrrolidone, which were mixed, then coated on Cu foil and dried at 80 °C under vacuum for 12 h. The mass loading of each working electrode was ~ 1.0 - 1.1 mg cm<sup>-2</sup>. For sodium-ion batteries (SIBs) half-cell, sodium foil was the counter electrode, and the was the 1 M NaClO<sub>4</sub> in ethylene carbonate (EC)/diethyl carbonate (1:1, v/v) with 5 wt % fluoroethylene carbonate was used as the electrolyte. For potassium ion batteries (PIBs) half-cell, the potassium foil was employed as the counter electrode, and the electrolyte in the cell was 1 M KPF<sub>6</sub> in EC/propylene carbonate (1:1 v/v). SICs full cell was also fabricated with the optimized Ni<sub>2</sub>P<sub>0.75</sub>S<sub>0.25</sub>/Ni@C/G as the anode and activated carbon (AC) as the cathode in the same electrolyte, and the mass ratio of cathode/anode was 3:1. A Whatman GF/F glass microfiber filter was used as the separator for SIBs, PIBs, and SICs.

*Electrochemical testing.* Galvanostatic discharge/charge (GDC) test and cycle-life tests were performed on a Land 2001A tester (Wuhan Land Electronics. Ltd.). Cyclic voltammetry (CV), GDC measurements of NICs, and electrical impedance spectroscopy (EIS) test from 100 kHz to 10 mHz. The specific capacitance ( $C$ , F g<sup>-1</sup>), energy density ( $E$ , Wh kg<sup>-1</sup>) and power density ( $P$ , W kg<sup>-1</sup>) of NICs were calculated using the following equations<sup>2, 3</sup>:

$$C = I / [(dV / dt) \times m] \approx I\Delta t / m\Delta V,$$

$$E = 0.5 CV^2$$

$$P = E/t$$

where  $I$  is the discharge current,  $\Delta t$  is the discharge time (s),  $m$  is the total mass of active material of the two electrodes, and  $V$  stands for working voltage, respectively.

*Computational Methods.* The first principle calculations have been employed to calculate the Na<sup>+</sup> ion adsorption energy and diffusion energy barrier of Ni<sub>2</sub>P (111),

Ni<sub>9</sub>S<sub>8</sub> (222), and layer-Ni<sub>2</sub>P (111)-Ni<sub>9</sub>S<sub>8</sub> (222) hetero-structure, respectively. The lattice mismatch was as follows:  $\Delta u = -4.94\%$ ,  $\Delta v = -3.17\%$ . All calculations were based on density functional theory (DFT) and performed using the Cambridge Serial Total Energy Package (CASTEP) module, employing the ultra-soft pseudo-potential.<sup>4</sup> The exchange-correlation functional under the generalized gradient approximation (GGA) level was carried out using the Perdew-Burke-Ernzerhof (PBE) for solids functional.<sup>5</sup> The cut-off energy and the vacuum distance between the slabs were set to 517 eV and 20 Å, respectively. The Broyden-Fletcher-Goldfarb-Shanno scheme was employed as the minimization algorithm in the geometric optimization process until the force of each atom was smaller than 0.03 eV/Å.<sup>6</sup> The Brillouin zone was set as  $3 \times 3 \times 1$  *k*-grid, and the vacuum distance between the slabs was set to 20 Å.

In the computation of the Na<sup>+</sup> adsorption energy, the following equation was performed:

$$E_{\text{ads}} = E_{\text{slab-substrate-Na}^+} - (E_{\text{slab-substrate}} + E_{\text{slab-Na}^+})$$

where  $E_{\text{slab-substrate}}$  and  $E_{\text{slab-Na}^+}$  are the total energy of the relaxed, isolated substrate slabs (Ni<sub>2</sub>P (111), Ni<sub>9</sub>S<sub>8</sub> (222), and Ni<sub>2</sub>P(111)-Ni<sub>9</sub>S<sub>8</sub>(222) interface) and single Na<sup>+</sup> in the same slab, respectively.  $E_{\text{slab-substrate-Na}^+}$  is the total energy of the slab-substrate-Na<sup>+</sup> system. The migration barrier of Na-ion was conducted using the supercell by the complete LST/QST method in the CASTEP module.

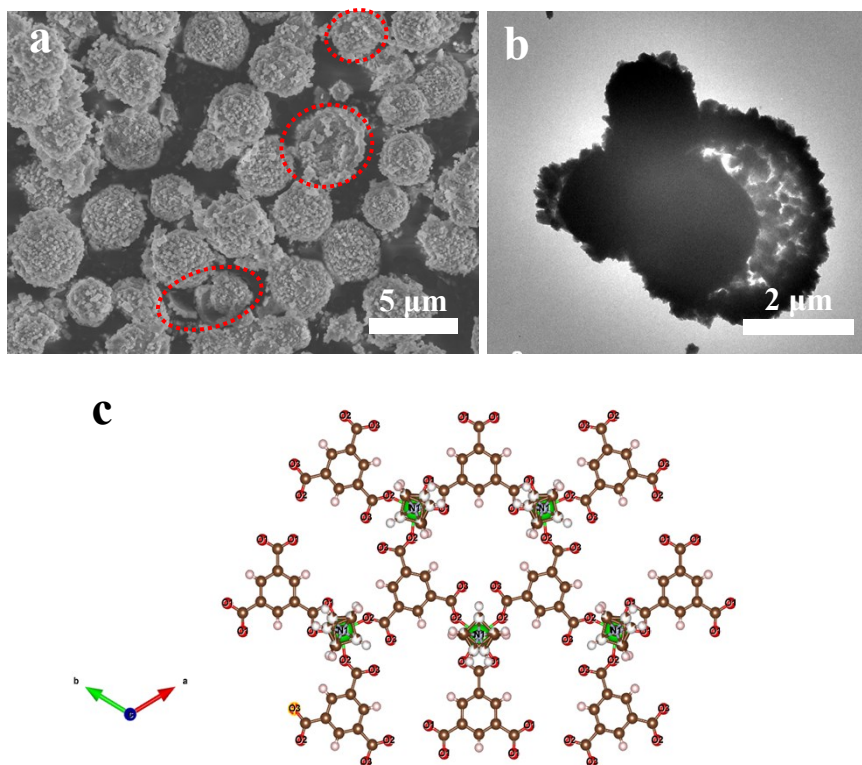

**Figure S1** (a) SEM, (b) TEM image, and (c) Coordination environments of Ni<sup>2+</sup> ions in the asymmetric units of Ni-MOF.

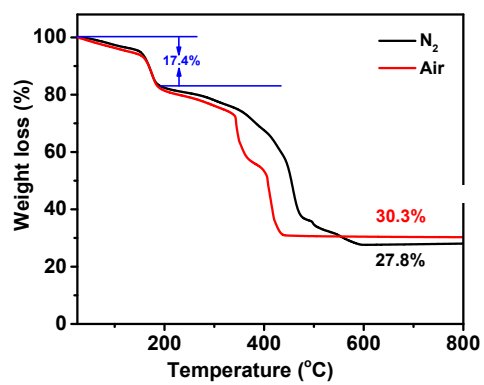

**Figure S2** TGA-DSC curves of Ni-MOF in the Ar and air atmosphere.

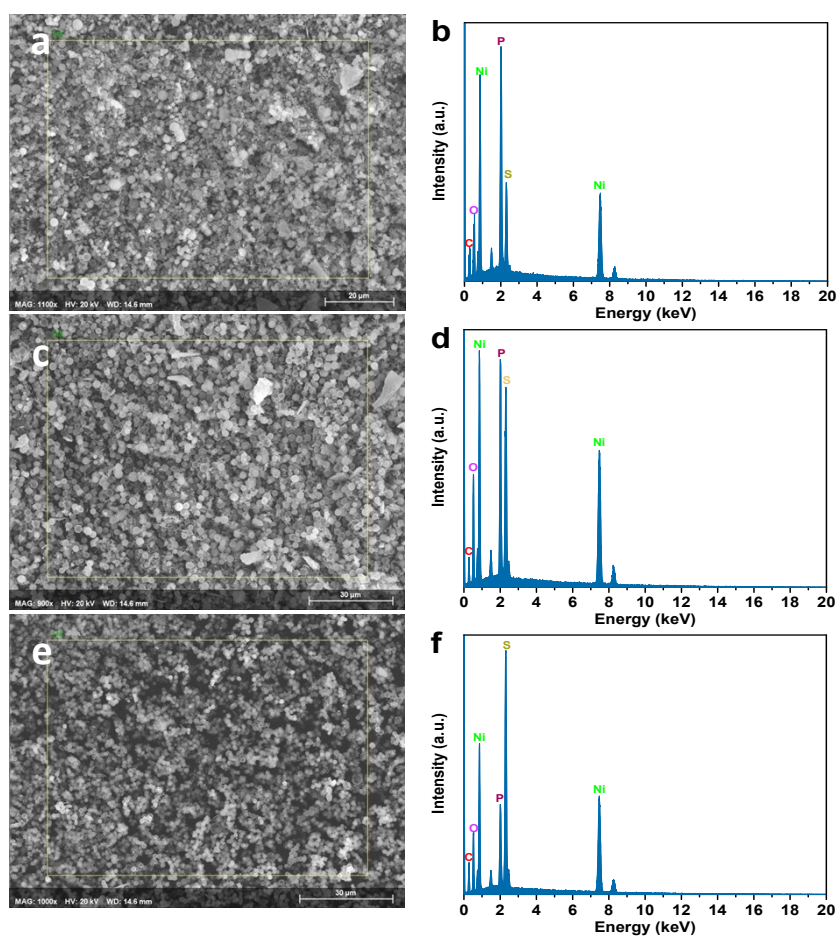

**Figure S3** SEM images and EDX spectra of YS  $\text{Ni}_2\text{P}_{1-x}\text{S}_x/\text{Ni}@C/\text{G}$ , where (a, b), (c, d), and (e, f) correspond to  $x = 0.25$ ,  $0.42$ , and  $0.53$ , respectively.

**Table S1** The  $x$  value of the  $\text{Ni}_2\text{P}_{1-x}\text{S}_x/\text{Ni}@C/\text{G}$  determined by EDX.

| Sample                                                              | X value | Mass weight |             |
|---------------------------------------------------------------------|---------|-------------|-------------|
|                                                                     |         | P power (g) | S power (g) |
| YS $\text{Ni}_2\text{P}/\text{Ni}@C/\text{G}$                       | 0       | 0.080       | 0           |
| YS $\text{Ni}_2\text{P}_{0.75}\text{S}_{0.25}/\text{Ni}@C/\text{G}$ | 0.25    | 0.053       | 0.027       |
| YS $\text{Ni}_2\text{P}_{0.58}\text{S}_{0.42}/\text{Ni}@C/\text{G}$ | 0.42    | 0.040       | 0.040       |
| YS $\text{Ni}_2\text{P}_{0.37}\text{S}_{0.53}/\text{Ni}@C/\text{G}$ | 0.53    | 0.027       | 0.053       |
| YS $\text{Ni}_9\text{S}_8/\text{Ni}@C/\text{G}$                     | 0.89    | 0           | 0.080       |

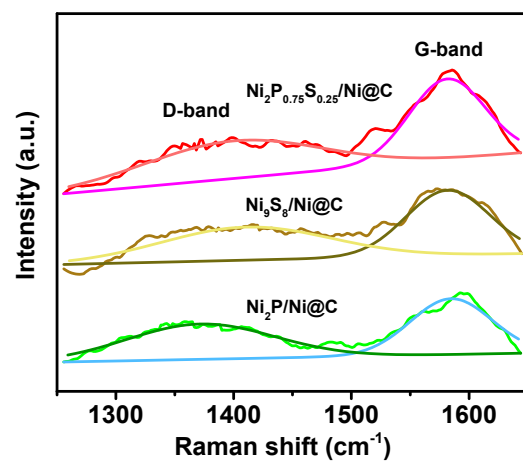

**Figure S4** Raman spectra of  $\text{Ni}_2\text{P}/\text{Ni@C}/\text{G}$ ,  $\text{Ni}_9\text{S}_8/\text{Ni@C}/\text{G}$ , and  $\text{Ni}_2\text{P}_{0.75}\text{S}_{0.25}/\text{Ni@C}/\text{G}$ , respectively.

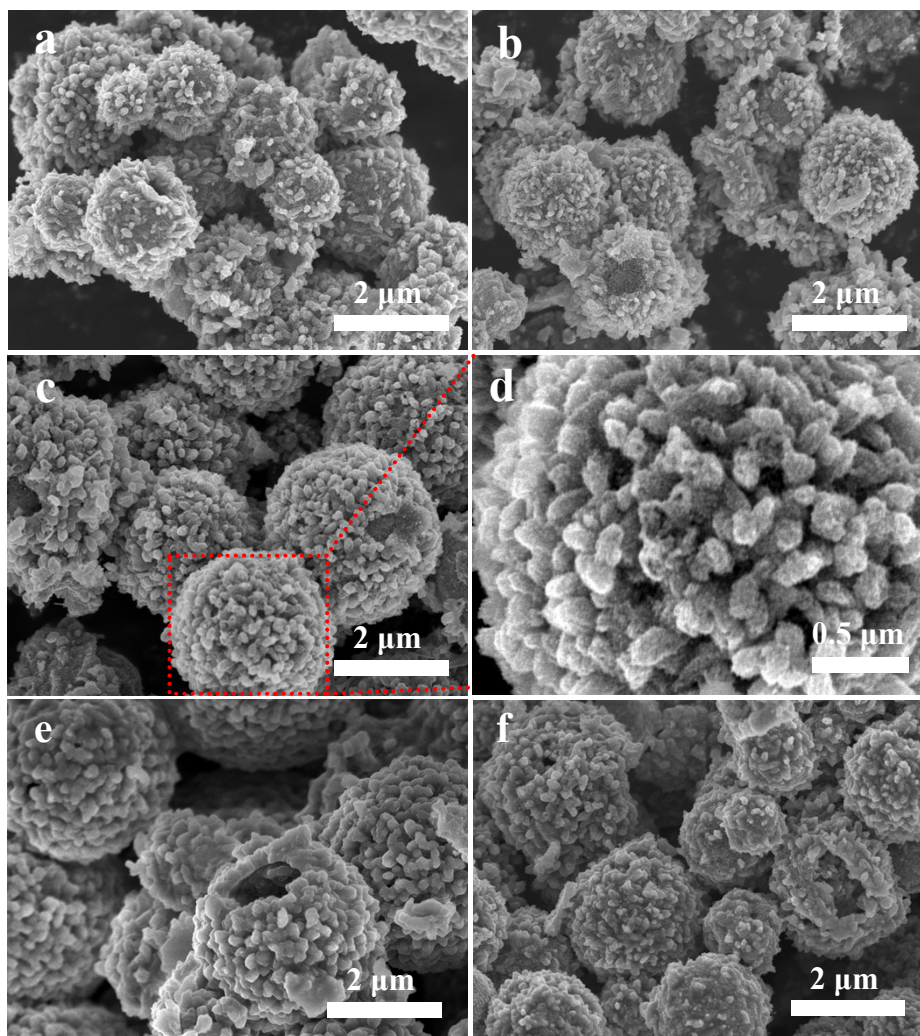

**Figure S5** (a) SEM images of (a) YS Ni<sub>2</sub>P/Ni@C/G, (b) YS Ni<sub>9</sub>S<sub>8</sub>/Ni@C/G, and (c-f) YS Ni<sub>2</sub>P<sub>1-x</sub>S<sub>x</sub>/Ni@C/G, respectively.



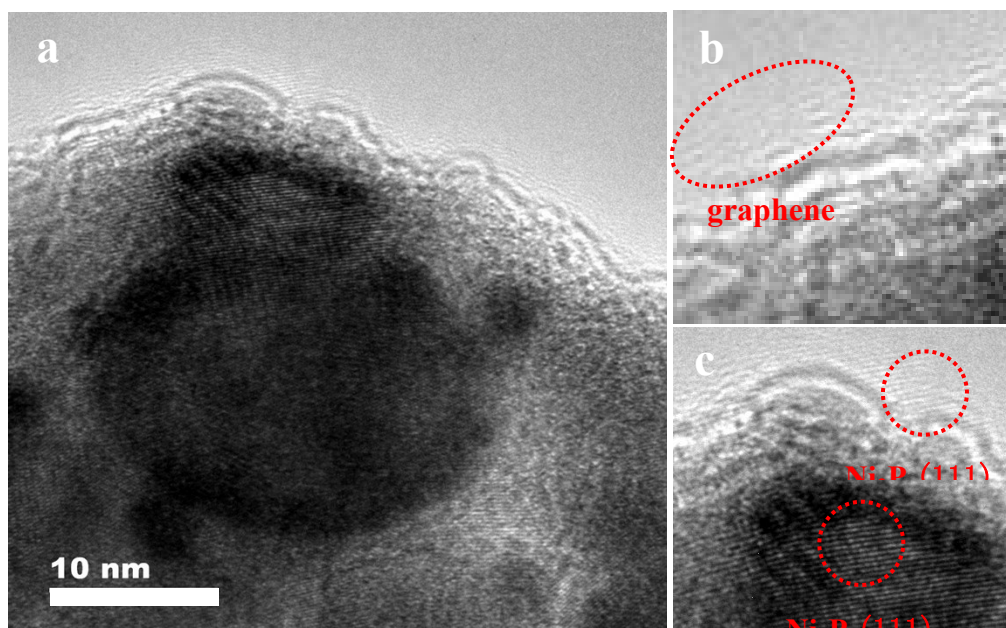

**Figure S6** TEM images of YS  $\text{Ni}_2\text{P}_{0.75}\text{S}_{0.25}/\text{Ni}@C/G$ .

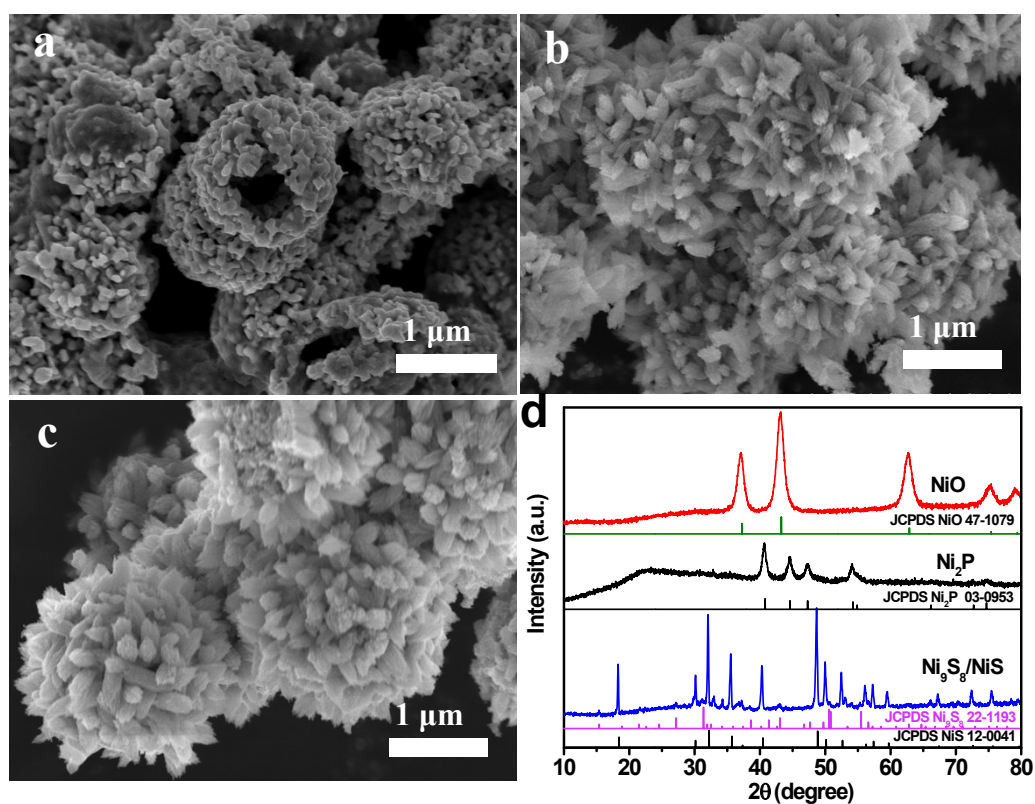

**Figure S7** SEM images of porous (a)  $\text{NiO}$ , (b)  $\text{Ni}_2\text{P}$ , (c)  $\text{Ni}_9\text{S}_8/\text{NiS}$ , and (d) their corresponding XRD patterns, respectively.

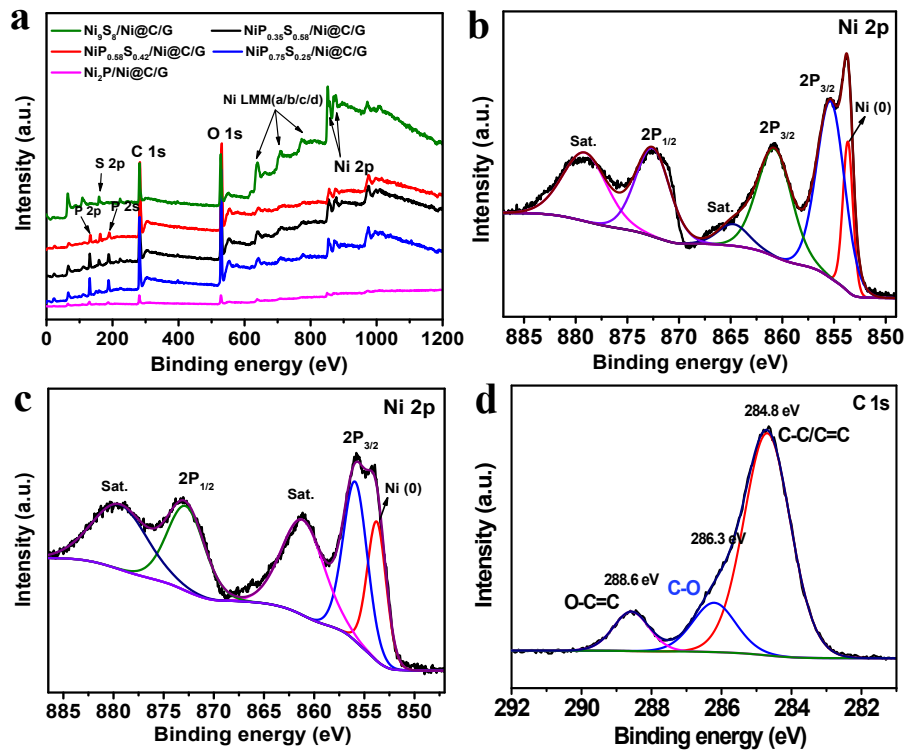

**Figure S8** (a) XPS full survey spectra of YS  $\text{NiP}_{1-x}\text{S}_x/\text{Ni}@C/\text{G}$ ,  $\text{Ni}_2\text{P}/\text{Ni}@C/\text{G}$  and  $\text{Ni}_9\text{S}_8/\text{Ni}@C/\text{G}$ , (b) Ni 2p in YS  $\text{Ni}_2\text{P}/\text{Ni}@C/\text{G}$ , (c) Ni 2p in YS  $\text{Ni}_9\text{S}_8/\text{Ni}@C/\text{G}$ , (d) C 1s in YS  $\text{Ni}_2\text{P}_{0.75}\text{S}_{0.25}/\text{Ni}@C/\text{G}$ .

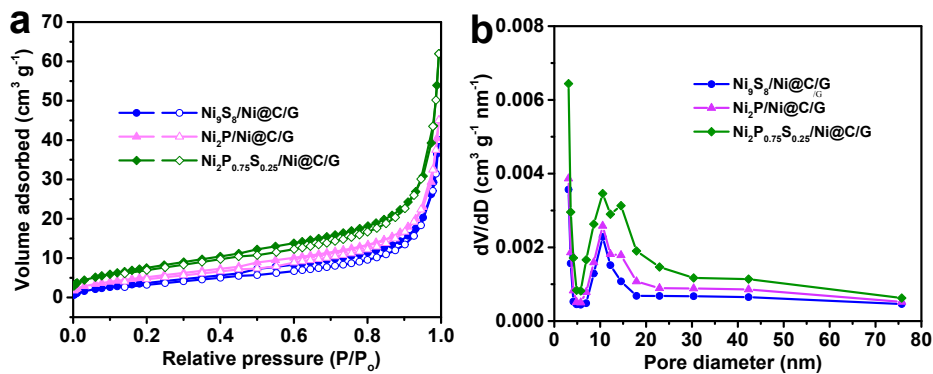

**Figure S9** (a)  $\text{N}_2$  adsorption-desorption isotherms and (b) pore-size distribution of YS  $\text{Ni}_2\text{P}/\text{Ni}@C/\text{G}$ , YS  $\text{Ni}_9\text{S}_8/\text{Ni}@C/\text{G}$ , and YS  $\text{Ni}_2\text{P}_{0.75}\text{S}_{0.25}/\text{Ni}@C/\text{G}$ , respectively.

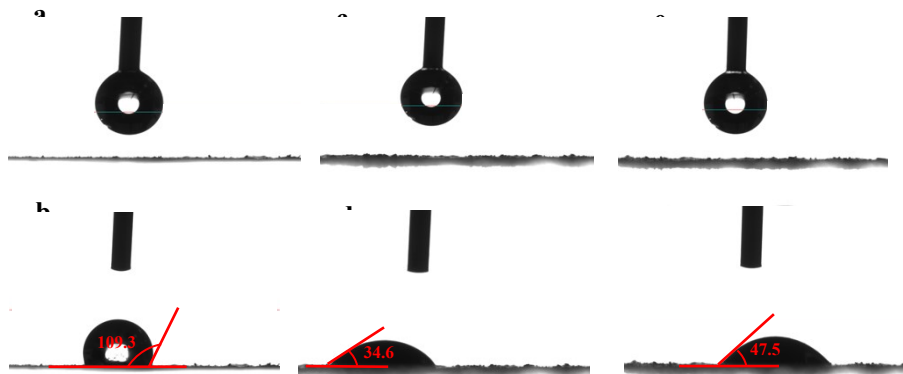

**Figure S10** Surface wetting of H<sub>2</sub>O droplet on (a, b) YS Ni<sub>9</sub>S<sub>8</sub>/Ni@C/G, (c, d) YS Ni<sub>2</sub>P/Ni@C/G, and (d, f) YS Ni<sub>2</sub>P<sub>0.75</sub>S<sub>0.25</sub>/Ni@C/G, respectively.

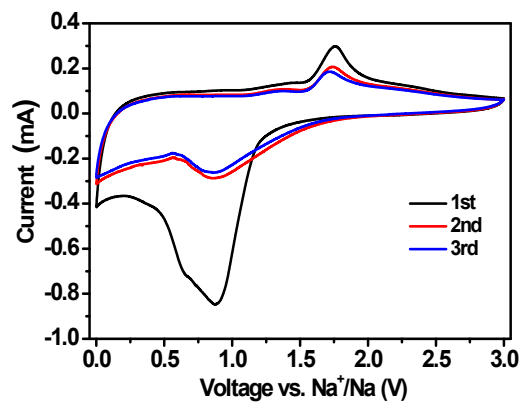

**Figure S11** CV curves of YS Ni<sub>2</sub>P<sub>0.75</sub>S<sub>0.25</sub>/Ni@C/G at a current density of 0.2 mV S<sup>-1</sup>.

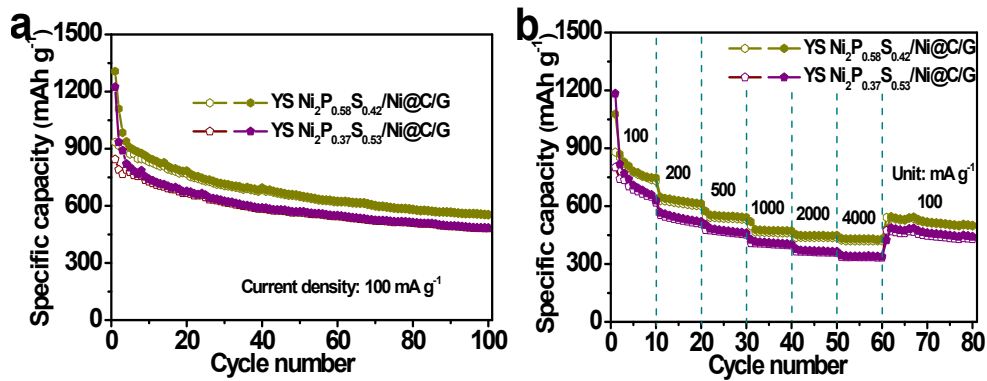

**Figure S12** (a) Cycling stability at 100 mA g<sup>-1</sup> and (a) rate capabilities of YS Ni<sub>2</sub>P<sub>0.58</sub>S<sub>0.42</sub>/Ni@C/G and YS Ni<sub>2</sub>P<sub>0.37</sub>S<sub>0.53</sub>/Ni@C/G for SIBs, respectively.

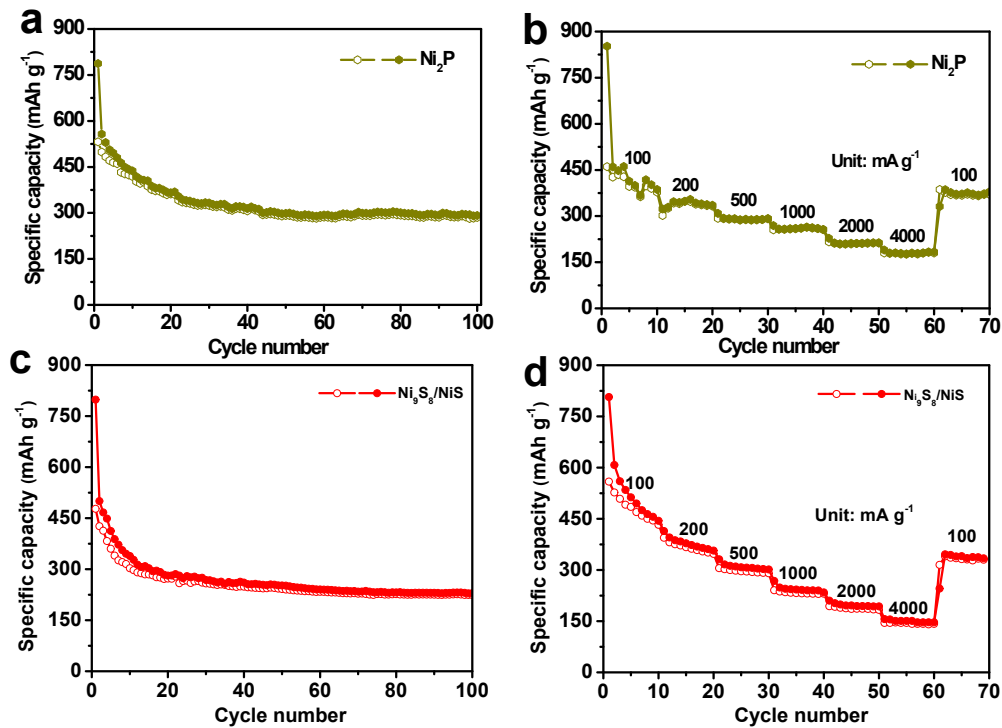

**Figure S13** Cycling stability at 100 mA g<sup>-1</sup> and rate capabilities of (a, b) Ni<sub>2</sub>P, and (c, d) Ni<sub>9</sub>S<sub>8</sub>/NiS for SIBs, respectively.

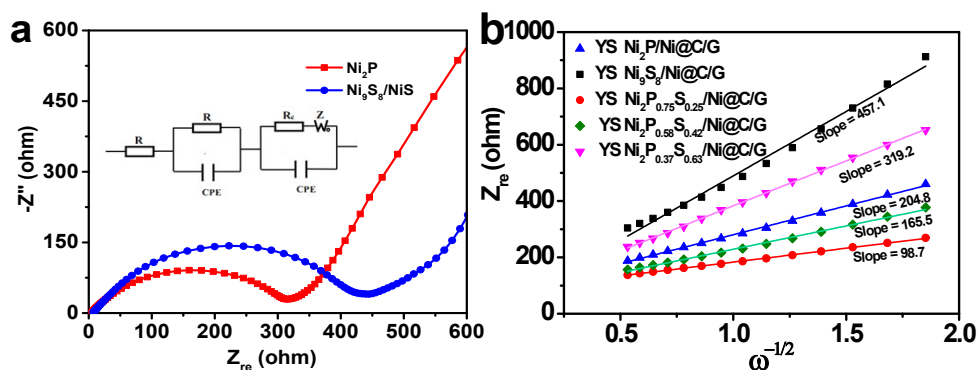

**Figure S14** (a) Nyquist impedance plots of Ni<sub>2</sub>P and Ni<sub>9</sub>S<sub>8</sub>/NiS after 100 cycles, and (b) the relationship plot between  $Z'$  and  $\omega^{-1/2}$ .

**Table S2** Electrochemical impedance parameters of as-obtained Ni-based anodes for SIBs from equivalent circuit fitting of experimental data.

| Sample                                                         | Cycle number            | $R_s$ /Ohm | $R_f$ /Ohm | $R_{ct}$ /Ohm |
|----------------------------------------------------------------|-------------------------|------------|------------|---------------|
| Ni <sub>9</sub> S <sub>8</sub> /NiS                            | 100 <sup>th</sup> cycle | 5.7        | 109.3      | 319.0         |
| YS Ni <sub>9</sub> S <sub>8</sub> /Ni@C/G                      | 100 <sup>th</sup> cycle | 4.6        | 28.89      | 56.6          |
| Ni <sub>2</sub> P                                              | 100 <sup>th</sup> cycle | 5.4        | 107.8      | 208.1         |
| YS Ni <sub>2</sub> P/Ni@C/G                                    | 100 <sup>th</sup> cycle | 4.7        | 25.3       | 36.9          |
| YS Ni <sub>2</sub> P <sub>0.75</sub> S <sub>0.25</sub> /Ni@C/G | 100 <sup>th</sup> cycle | 4.7        | 24.9       | 36.0          |
| YS Ni <sub>2</sub> P <sub>0.58</sub> S <sub>0.42</sub> /Ni@C/G | 100 <sup>th</sup> cycle | 4.8        | 26.7       | 37.6          |
| YS Ni <sub>2</sub> P <sub>0.37</sub> S <sub>0.63</sub> /Ni@C/G | 100 <sup>th</sup> cycle | 4.6        | 26.4       | 38.3          |

**Equations (1) and (2):**

$$D = \frac{R^2 T^2}{2A^2 n^4 F^4 c^2 \sigma_w^2} \quad (1) \quad Z' = R' + \sigma_w \omega^{-1/2} \quad (2)$$

Where  $R$  is the gas constant,  $T$  is the absolute temperature,  $A$  is the surface area of the electrode,  $n$  is the number of transferred electrons per molecule,  $F$  is the Faraday constant,  $c$  is the molar concentration of Na<sup>+</sup> ions,  $R'$  mainly involves the interface impedance and charge transfer resistances for these electrodes,  $\omega$  ( $\omega = 2\pi f$ ) is the angular frequency, and  $\sigma_w$  is the Warburg factor ( $Z' \propto \sigma_w \omega^{-1/2}$ ), respectively.

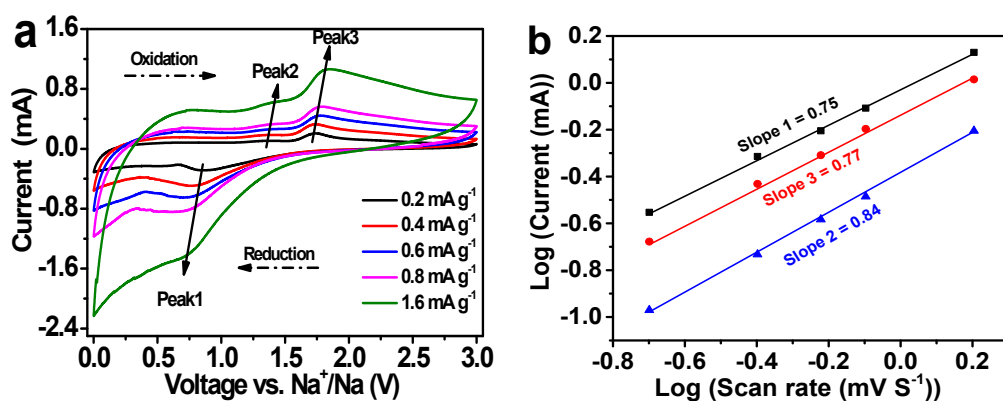

**Figure S15** (a) CV scans of YS  $\text{Ni}_2\text{P}_{0.75}\text{S}_{0.25}/\text{Ni}@C/\text{G}$  at various rates and (b) correspondingly fitted b-value at respective redox peaks for SIBs anode.

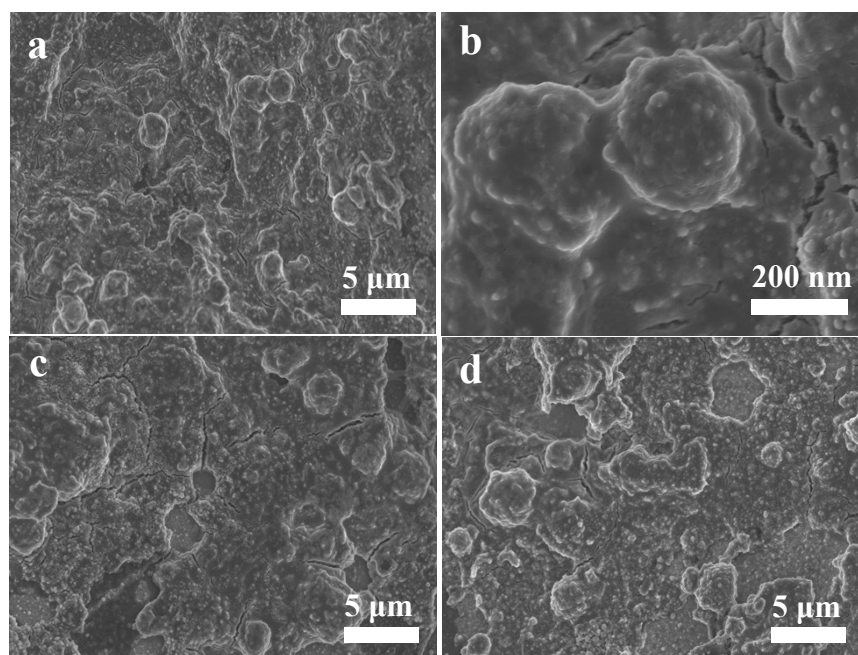

**Figure S16** SEM images of (a, b) YS  $\text{Ni}_2\text{P}_{0.75}\text{S}_{0.25}/\text{Ni}@C/\text{G}$ , (c) YS  $\text{Ni}_2\text{P}_{0.58}\text{S}_{0.42}/\text{Ni}@C/\text{G}$  and (d) YS  $\text{Ni}_2\text{P}_{0.37}\text{S}_{0.53}/\text{Ni}@C/\text{G}$  after 100 cycles at  $100 \text{ mA g}^{-1}$ , respectively.

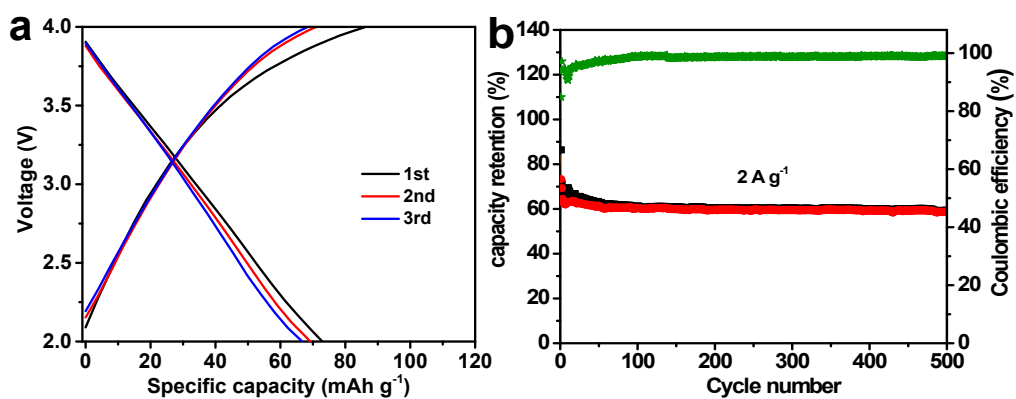

**Figure S17** (a) GCD curves, and (b) cycle performance at 2 A g<sup>-1</sup> of the AC cathode for Na-storage.

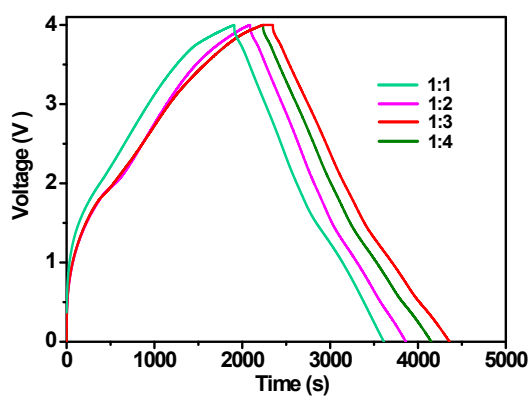

**Figure S18** GDC curves of SICs with different mass ratios (anode: cathode, 1:1, 1:2, 1:3, and 1:4) at a current density of 0.5 A g<sup>-1</sup>.

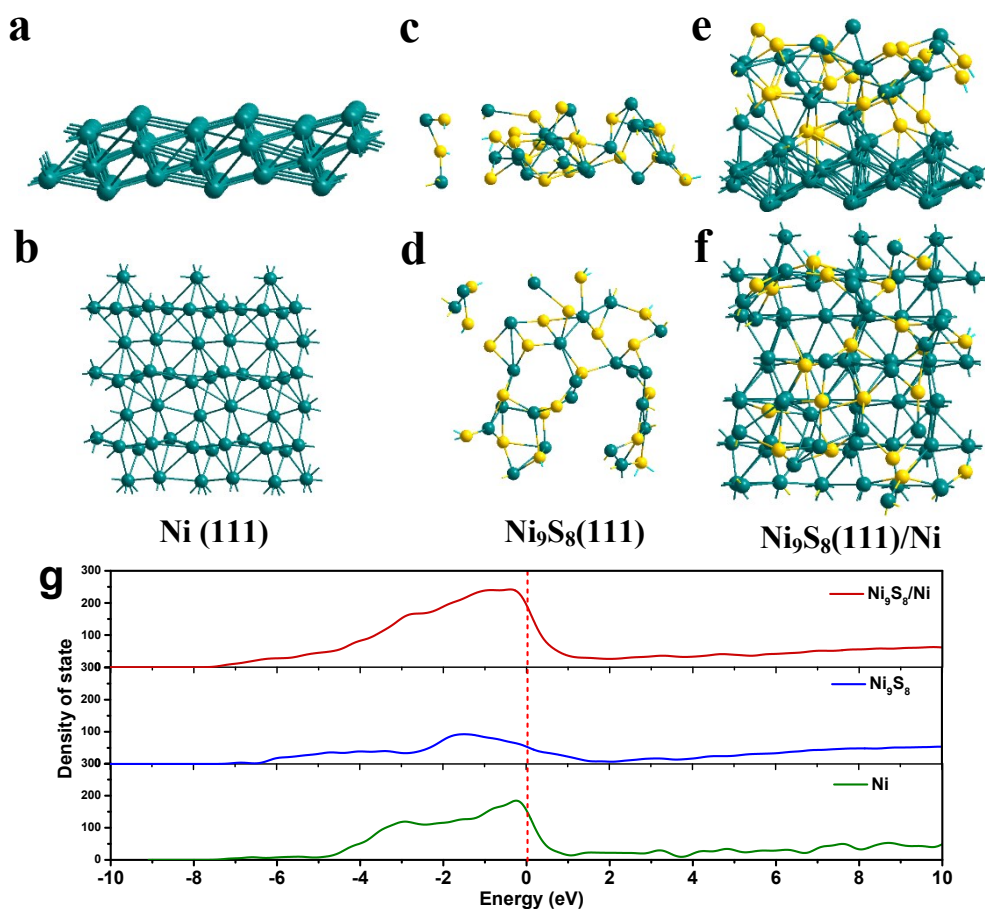

**Figure S19** (a, c, e) Side-, and (b, d, f) top-views schematic model of the Ni (111),  $\text{Ni}_9\text{S}_8$  (222), and the  $\text{Ni}_9\text{S}_8$  (222)-Ni, and (g) DOS curves for Ni (111),  $\text{Ni}_9\text{S}_8$  (222), and the  $\text{Ni}_9\text{S}_8$  (222)/Ni.

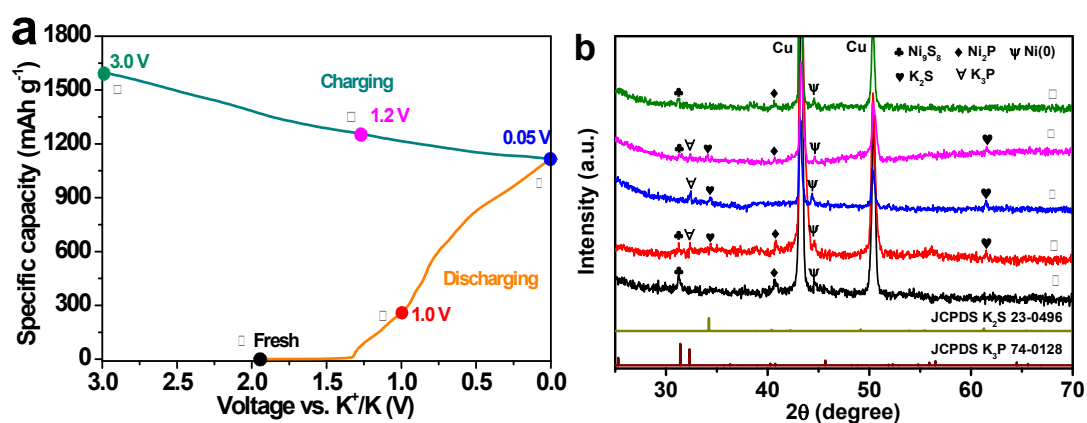

**Figure S20** (a) The first charge-discharge profile and (b) its corresponding ex-situ XRD patterns of YS  $\text{Ni}_2\text{P}_{0.75}\text{S}_{0.25}/\text{Ni}@C/\text{G}$  anode in PIBs at the different voltage platforms.



**Table S3** Performance comparison of between  $\text{Ni}_2\text{P}_{0.75}\text{S}_{0.25}/\text{Ni}@C/\text{G}$  and the reported anode materials for PIBs

| Sample                                                           | Cycling performance (mAh g <sup>-1</sup> )/cycle number, current density (mA g <sup>-1</sup> ) | Rate capability (mAh g <sup>-1</sup> )/current density (mA g <sup>-1</sup> ) | Reference                                      |
|------------------------------------------------------------------|------------------------------------------------------------------------------------------------|------------------------------------------------------------------------------|------------------------------------------------|
| $\text{Ni}_2\text{P}_{0.75}\text{S}_{0.25}/\text{Ni}@C/\text{G}$ | <b>372/200, 150</b>                                                                            | <b>238/3200</b>                                                              | <b>This work</b>                               |
| NiS <sub>2</sub> @C@C                                            | 303/100, 50                                                                                    | 151/1610                                                                     | <i>Adv. Funct. Mater.</i> 2019, 29, 1903454    |
| ZnSe-FeSe <sub>2</sub> /RGO                                      | 363/100, 50                                                                                    | --                                                                           | <i>J. Power Sources</i> 2020, 455, 227937      |
| Y-S NiS <sub>x</sub> @C                                          | 364/200, 100                                                                                   | 232/2000                                                                     | <i>J. Mater. Chem. A</i> , 2019, 7, 18932      |
| mp-Co <sub>9</sub> S <sub>8</sub> @C/rGO                         | 408/100, 200                                                                                   | 278/2000                                                                     | <i>Nano Res.</i> 2020, 13, 802-809             |
| Fe-Ni-P hollow nanoframes                                        | 60/700, 200                                                                                    | 46/2000                                                                      | <i>Chem. Eng. J.</i> 2020, 390, 124515         |
| FeS <sub>2</sub> @G@CNF                                          | 205/100, 200                                                                                   | 171/1000                                                                     | <i>Small</i> 2019, 15, 1804740                 |
| Hollow V <sub>2</sub> O <sub>3</sub> @C sphere                   | 330/500, 100                                                                                   | 125/2000                                                                     | <i>J. Mater. Chem. A</i> , 2020, 8, 13261      |
| r-SnP@C                                                          | 355/300, 100                                                                                   | 258/1000                                                                     | <i>Carbon</i> 2020, 168, 468-474               |
| CoP@NPPCS                                                        | 127/1000, 100                                                                                  | 54/2000                                                                      | <i>Adv. Mater.</i> 2018, 30, 1802310           |
| TiO <sub>x</sub> N <sub>y</sub> /C                               | 125/100, 200                                                                                   | 72/1600                                                                      | <i>Chem. Eng. J.</i> 2019, 369, 828-833        |
| N/O Dual-dope hard Carbon-800                                    | 305/100, 100                                                                                   | 223/2000                                                                     | <i>Adv. Sci.</i> 2020, 7, 1902547              |
| SnO <sub>2</sub> @CF                                             | 399/150, 100                                                                                   | 247/2000                                                                     | <i>Energy Environ. Sci.</i> , 2020,13, 571-578 |
| NC@CoP/NC                                                        | 279/100, 100                                                                                   | 200/2000                                                                     | <i>Small</i> 2020, 16, 1906566                 |

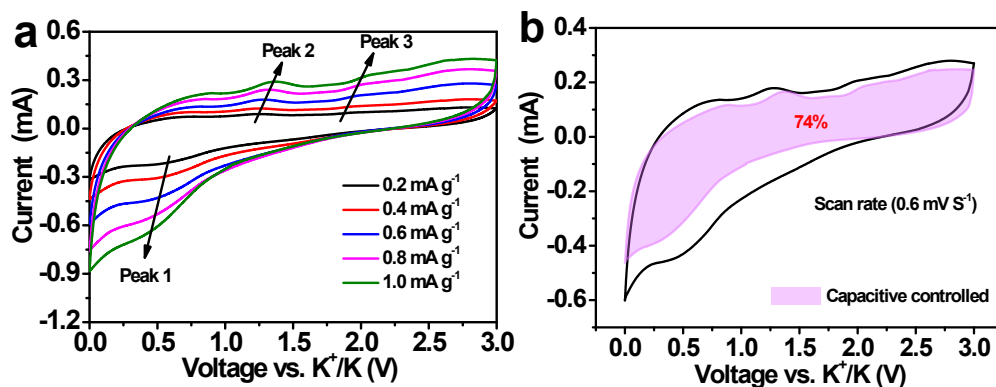

**Figure S21** (a) CV scans of YS Ni<sub>2</sub>P<sub>0.75</sub>S<sub>0.25</sub>/Ni@C/G at various rates, and (b) the shaded region shows the CV profile with the capacitive contribution at a scan rate of 0.6 mV s<sup>-1</sup> for PIBs anode.

#### References:

1. F. Zou, Y. M. Chen, K. Liu, Z. Yu, W. Liang, S. M. Bhaway, M. Gao and Y. Zhu, *ACS Nano*, 2016, **10**, 377-386.
2. H. Kim, M.-Y. Cho, M.-H. Kim, K.-Y. Park, H. Gwon, Y. Lee, K. C. Roh and K. Kang, *Adv. Energy Mater.*, 2013, **3**, 1500-1506.
3. J. L. Rutao Wang, Peng Zhang, Zongyuan Lin, Xingbin Yan, *Adv. Funct. Mater.*, 2015, **25**, 2270-2278.
4. D. Vanderbilt, *Phys. Rev. B*, 1990, **41**, 7892-7895.
5. J. P. Perdew, A. Ruzsinszky, G. I. Csonka, O. A. Vydrov, G. E. Scuseria, L. A. Constantin, X. Zhou and K. Burke, *Phys. Rev. Lett.*, 2008, **100**, 136406.
6. B. G. Pfrommer, M. Côté, S. G. Louie and M. L. Cohen, *J. Comput. Phys.*, 1997, **131**, 233-240.
